# Supplementary material for: The Origin of the Cyathea delgadii Sternb. Somatic Embryos Is Determined by the Developmental State of Donor Tissue and Mutual Balance of Selected Metabolites
Source: MDPI journal article supplement (doi:10.3390/cells10061388), 2021-06-04
Supplement: s1 [file s1]

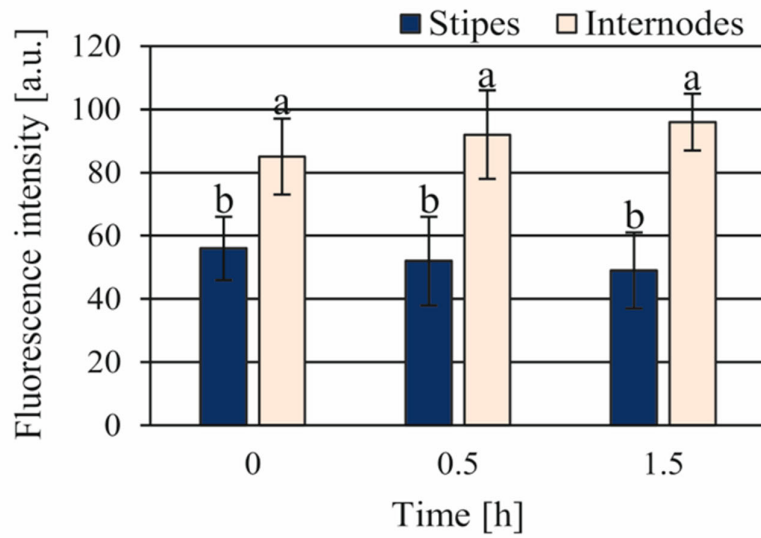

**Supplementary Figure S1.** The intensity of callose fluorescence in *C. delgadii* stipe and internode explants. The relative amount of callose was expressed in arbitrary units (a.u.) of fluorescence intensity after staining with aniline blue and measured immediately, 0.5 and 1.5 h after sample dissection. The Student's test was used to estimate statistical significance of results. Data are presented as the mean  $\pm$  standard deviation (SD) from 7 samples (each consisting of 4 thin free-hand cross sections). Data indicated with different letters are significantly different at  $P < 0.05$ .

**Supplementary Table S1.** Multiple reactions monitoring (MRM) transitions for the analysed plant hormones and other compounds at positive ion mode (+ESI), capillary voltage 4 kV, gas temperature 350 °C, gas flow 12 l min<sup>-1</sup>, and nebulizer pressure 35 psi. MassHunter software was used to control the LC-MS/MS system and in data analysis. For MRM parameters optimization MassHunter Optimizer was used. Compound functioning as internal standard (ISTD) were labelled with stable isotopes (D - <sup>2</sup>H and N15 - <sup>15</sup>N).

| Compound     | Type of ion | Quantifier transition<br>(precursor/product<br>ions) ( <i>m/z</i> ) | Fragmentor<br>voltage (V) | Collision<br>energy (V) | Retention time<br>(min) |
|--------------|-------------|---------------------------------------------------------------------|---------------------------|-------------------------|-------------------------|
| ABA          |             | [M-H <sub>2</sub> O+H] <sup>+</sup> 247.4/187.2                     | 80                        | 14                      | 17.67                   |
| D-ABA        | ISTD        | [M-H <sub>2</sub> O+H] <sup>+</sup> 253.4/191.3                     | 80                        | 14                      | 17.59                   |
| ABA-Glc      |             | [M-H <sub>2</sub> O+H] <sup>+</sup> 409.2/247.1                     | 104                       | 14                      | 12.24                   |
| BA           |             | [M+H] <sup>+</sup> 1124.1/78.0                                      | 60                        | 14                      | 9.05                    |
| D-BA         | ISTD        | [M+H] <sup>+</sup> 128.1/84.2                                       | 60                        | 14                      | 8.48                    |
| <i>cisZ</i>  |             | [M+H] <sup>+</sup> 220.2/136.3                                      | 85                        | 9                       | 2.75                    |
| <i>cisZR</i> |             | [M+H] <sup>+</sup> 352.2/220.3                                      | 120                       | 9                       | 6.67                    |
| D-OPDA       | ISTD        | [M+H] <sup>+</sup> 270.3/252.2                                      | 84                        | 5                       | 23.72                   |
| DHZ          |             | [M+H] <sup>+</sup> 222.2/136.0                                      | 124                       | 18                      | 2.35                    |
| N15-DHZ      | ISTD        | [M+H] <sup>+</sup> 226.2/140.0                                      | 124                       | 18                      | 2.32                    |
| DHZR         |             | [M+H] <sup>+</sup> 354.2/222.1                                      | 124                       | 14                      | 6.26                    |
| GA1          |             | [M-H <sub>2</sub> O+H] <sup>+</sup> 331.3/285.3                     | 100                       | 14                      | 11.32                   |
| D-GA1        | ISTD        | [M-H <sub>2</sub> O+H] <sup>+</sup> 333.3/287.2                     | 58                        | 9                       | 11.27                   |
| GA3          |             | [M-H <sub>2</sub> O+H] <sup>+</sup> 329.3/311.3                     | 100                       | 14                      | 10.89                   |
| GA4          |             | [M-H <sub>2</sub> O+H] <sup>+</sup> 315.3/269.3                     | 100                       | 14                      | 21.80                   |
| D-GA4        | ISTD        | [M-H <sub>2</sub> O+H] <sup>+</sup> 317.3/271.2                     | 88                        | 9                       | 21.78                   |
| GA5          |             | [M-H <sub>2</sub> O+H] <sup>+</sup> 285.1/115.0                     | 96                        | 5                       | 18.07                   |
| D-GA5        | ISTD        | [M-H <sub>2</sub> O+H] <sup>+</sup> 287.3/115.0                     | 96                        | 5                       | 18.05                   |
| GA6          |             | [M-H <sub>2</sub> O+H] <sup>+</sup> 329.3/115.1                     | 104                       | 14                      | 13.69                   |
| D-GA6        | ISTD        | [M-H <sub>2</sub> O+H] <sup>+</sup> 331.3/115.1                     | 96                        | 5                       | 13.65                   |
| GA7          |             | [M-H <sub>2</sub> O+H] <sup>+</sup> 313.2/223.1                     | 104                       | 14                      | 21.58                   |
| GA8          |             | [M-H <sub>2</sub> O+H] <sup>+</sup> 319.3/257.2                     | 102                       | 9                       | 5.41                    |
| I3CA         |             | [M+H] <sup>+</sup> 162.2/118.1                                      | 58                        | 9                       | 10.89                   |
| IAA          |             | [M+H] <sup>+</sup> 176.1/130.3                                      | 51                        | 9                       | 10.91                   |
| D-IAA        | ISTD        | [M+H] <sup>+</sup> 181.1/135.1                                      | 38                        | 14                      | 10.63                   |
| IAA-Asp      |             | [M+H] <sup>+</sup> 291.2/130.1                                      | 54                        | 25                      | 5.09                    |
| IAA-Glu      |             | [M+H] <sup>+</sup> 305.2/130.1                                      | 58                        | 29                      | 9.89                    |
| IBA          |             | [M+H] <sup>+</sup> 204.1/186.4                                      | 69                        | 9                       | 19.64                   |
| iP           |             | [M+H] <sup>+</sup> 204.1/148.3                                      | 90                        | 9                       | 7.37                    |
| iPR          |             | [M+H] <sup>+</sup> 336.2/204.1                                      | 124                       | 14                      | 13.50                   |
| JA           |             | [M+H] <sup>+</sup> 211.3/151.2                                      | 80                        | 14                      | 19.20                   |
| D-JA         | ISTD        | [M+H] <sup>+</sup> 216.3/153.2                                      | 80                        | 5                       | 19.14                   |
| Kin          |             | [M+H] <sup>+</sup> 216.1/188.3                                      | 90                        | 9                       | 4.86                    |
| N15-Kin      | ISTD        | [M+H] <sup>+</sup> 220.1/192.3                                      | 90                        | 9                       | 4.82                    |
| KinR         |             | [M+H] <sup>+</sup> 348.2/216.3                                      | 116                       | 9                       | 9.21                    |
| MeJA         |             | [M+H] <sup>+</sup> 225.3/151.2                                      | 58                        | 5                       | 22.51                   |
| OPDA         |             | [M+H] <sup>+</sup> 293.3/275.2                                      | 68                        | 9                       | 25.54                   |
| <i>oxIAA</i> |             | [M+H] <sup>+</sup> 192.2/146.1                                      | 54                        | 9                       | 5.34                    |
| SA           |             | [M+H] <sup>+</sup> 139.2/121.2                                      | 80                        | 14                      | 11.93                   |
| D-SA         | ISTD        | [M+H] <sup>+</sup> 143.2/125.2                                      | 80                        | 14                      | 11.60                   |
| Z            |             | [M+H] <sup>+</sup> 220.2/136.3                                      | 85                        | 9                       | 2.29                    |
| Z7G          |             | [M+H] <sup>+</sup> 382.1/220.1                                      | 122                       | 17                      | 1.92                    |
| ZOG          |             | [M+H] <sup>+</sup> 382.1/202.1                                      | 142                       | 17                      | 2.30                    |
| ZR           |             | [M+H] <sup>+</sup> 352.2/220.3                                      | 120                       | 9                       | 6.00                    |
| D-ZR         | ISTD        | [M+H] <sup>+</sup> 357.3/225.2                                      | 116                       | 17                      | 5.90                    |

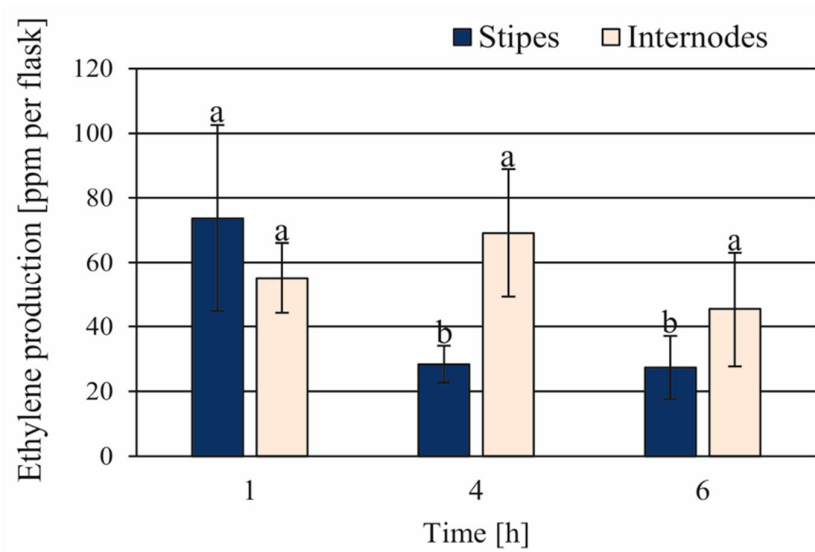

**Supplementary Figure S2.** Production of ethylene by the *C. delgadii* stipe and internode explants at 1, 4 and 6 h after sample dissection. The production was stabilized between 4 and 6 h after explant excision. Therefore, the results obtained after 6 h were used for further analyses. Values represent the means  $\pm$  standard deviation (SD) of 6 independent replicates. The Student's test was used to estimate statistical significance of results. Data followed by different letters are significantly different at  $P < 0.05$ .

**Supplementary Table S2.** Ratios of total contents of different compounds sorted into the basic classes in stipe and internode explants of *C. delgadii*.

| Compound ratios          | Stipe                | Internode          | Stipe/Internode compound ratio |
|--------------------------|----------------------|--------------------|--------------------------------|
| Aux/CKs                  | 21.5 ±2.5a           | 20.0 ±5.6a         | 1.0                            |
| Aux/GAs                  | 1.5 ±0.2a            | 1.8 ±0.5a          | 0.8                            |
| Aux/SHs:                 |                      |                    |                                |
| Aux/SA+BA                | 0.4 ±0.1a            | 0.4 ±0.1a          | 1.0                            |
| Aux/ABA+ABA-Glc          | 3.0 ±0.7a            | 4.5 ±1.6a          | 0.7                            |
| Aux/JA+MeJA+OPDA         | 3 ±0.2a              | 3.0 ±1.0a          | 1.0                            |
| <b>Aux/ETH</b>           | <b>157.2 ±45.1a</b>  | <b>62.2 ±28.0b</b> | <b>2.5</b>                     |
| <b>Aux/PhAs</b>          | <b>2.6 ±0.3a</b>     | <b>4.3 ±0.7b</b>   | <b>0.6</b>                     |
| Aux/PAs                  | 6.2 ±1.3a            | 6.1 ±1.2a          | 1.0                            |
| <b>CKs/GAs</b>           | <b>0.070 ±0.005a</b> | <b>0.09 ±0.02b</b> | <b>0.8</b>                     |
| CKs/SHs:                 |                      |                    |                                |
| CKs/SA+BA                | 0.02 ±0.002a         | 0.02 ±0.003a       | 1.0                            |
| <b>CKs/ABA+ABA-Glc</b>   | <b>0.1 ±0.04a</b>    | <b>0.2 ±0.09b</b>  | <b>0.5</b>                     |
| CKs/JA+MeJA+OPDA         | 0.1 ±0.02a           | 0.2 ±0.03a         | 0.5                            |
| <b>CKs/ETH</b>           | <b>7.4 ±2.1a</b>     | <b>3.1 ±1.0b</b>   | <b>2.4</b>                     |
| <b>CKs/PhAs</b>          | <b>0.1 ±0.02a</b>    | <b>0.2 ±0.06b</b>  | <b>0.5</b>                     |
| CKs/PAs                  | 0.3 ±0.03a           | 0.3 ±0.1a          | 1.0                            |
| GAs/SHs:                 |                      |                    |                                |
| <b>GAs/SA+BA</b>         | <b>0.3 ±0.03a</b>    | <b>0.2 ±0.05b</b>  | <b>1.5</b>                     |
| GAs/ABA+ABA-Glc          | 2.1 ±0.6a            | 2.7 ±1a            | 0.8                            |
| <b>GAs/JA+MeJA+OPDA</b>  | <b>2.1 ±0.2a</b>     | <b>1.7 ±0.4b</b>   | <b>1.2</b>                     |
| <b>GAs/ETH</b>           | <b>108.6 ±29.8a</b>  | <b>34.8 ±12.7b</b> | <b>3.1</b>                     |
| <b>GAs/PhAs</b>          | <b>1.8 ±0.3a</b>     | <b>2.5 ±0.6b</b>   | <b>0.7</b>                     |
| GAs/PAs                  | 4.3 ±0.7a            | 3.7 ±1.3a          | 1.2                            |
| PhAs/SHs:                |                      |                    |                                |
| <b>PhAs/SA+BA</b>        | <b>0.2 ±0.04a</b>    | <b>0.1 ±0.02b</b>  | <b>2.0</b>                     |
| PhAs/ABA+ABA-Glc         | 1.2 ±0.4a            | 1.0 ±0.3a          | 1.2                            |
| <b>PhAs/JA+MeJA+OPDA</b> | <b>1.2 ±0.2a</b>     | <b>0.7 ±0.2b</b>   | <b>1.7</b>                     |
| <b>PhAs/ETH</b>          | <b>61.5 ±21.9a</b>   | <b>14.3 ±5.9b</b>  | <b>4.3</b>                     |
| <b>PhAs/PAs</b>          | <b>2.4 ±0.5a</b>     | <b>1.5 ±0.4b</b>   | <b>1.6</b>                     |
| PAs /SHs:                |                      |                    |                                |
| PAs/SA+BA                | 0.07 ±0.01a          | 0.06 ±0.02a        | 1.2                            |
| <b>PAs/ABA+ABA-Glc</b>   | <b>0.5 ±0.2a</b>     | <b>0.8 ±0.3b</b>   | <b>0.6</b>                     |
| PAs/JA+MeJA+OPDA         | 0.5 ±0.1a            | 0.5 ±0.2a          | 1.0                            |
| <b>PAs/ETH</b>           | <b>26 ±8.9a</b>      | <b>11 ±6.1b</b>    | <b>2.4</b>                     |

Values represent the means ±SD of 6 independent replicates. The Student's test was used to estimate significance of results for each type of compounds. Data followed by different letters are significantly different at  $P < 0.05$  and shown in bold.
